# Supplementary material for: DPP-based small molecule, non-fullerene acceptors for “channel II” charge generation in OPVs and their improved performance in ternary cells
Source: Royal Society of Chemistry journal article supplement (doi:10.1039/c4ra12184h), 2014-11-19
Supplement: c4ra12184h1.pdf [file c4ra12184h1.pdf]

## Electronic Supplementary Information (ESI)

# DPP-based small molecule, non-fullerene acceptors for “channel II” charge generation in OPVs and their improved performance in ternary cells

Y. Kim,<sup>a</sup> C. E. Song,<sup>b</sup> E.-J. Ko,<sup>a</sup> D. Kim,<sup>a</sup> S.-J. Moon<sup>b</sup> and E. Lim<sup>\*a</sup>

<sup>a</sup> Department of Chemistry, Kyonggi University, San 94-6, Iui-dong, Yeongtong-gu, Suwon-si, Gyeonggi 443-760, Republic of Korea

<sup>b</sup> Korea Research Institute of Chemical Technology (KRICT), 100 Jang-dong, Yuseong-gu, Daejeon 305-600, Republic of Korea

E-mail: ehlim@kyonggi.ac.kr

### Contents

|                                                        |    |
|--------------------------------------------------------|----|
| 1. <sup>1</sup> H and <sup>13</sup> C NMR spectra..... | S3 |
| 2. Normalized UV absorption spectra.....               | S6 |
| 3. OPV characteristics.....                            | S7 |
| 4. Atomic force microscopy (AFM) images.....           | S9 |

### List of Table

|                                                                                                |    |
|------------------------------------------------------------------------------------------------|----|
| Table S1 – Photovoltaic performances with various blend ratios and annealing temperatures..... | S7 |
|------------------------------------------------------------------------------------------------|----|

## List of Figures

|                                                                                                                                                                                                                                                                                                                                                                                                                                                                                                                                                                                                                        |    |
|------------------------------------------------------------------------------------------------------------------------------------------------------------------------------------------------------------------------------------------------------------------------------------------------------------------------------------------------------------------------------------------------------------------------------------------------------------------------------------------------------------------------------------------------------------------------------------------------------------------------|----|
| Figure S1 – $^1\text{H}$ NMR spectra of <i>p</i> -DPP-PhCN.....                                                                                                                                                                                                                                                                                                                                                                                                                                                                                                                                                        | S3 |
| Figure S2 – $^{13}\text{C}$ NMR spectra of <i>p</i> -DPP-PhCN.....                                                                                                                                                                                                                                                                                                                                                                                                                                                                                                                                                     | S3 |
| Figure S3 – $^1\text{H}$ NMR spectra of <i>m</i> -DPP-PhCN.....                                                                                                                                                                                                                                                                                                                                                                                                                                                                                                                                                        | S4 |
| Figure S4 – $^{13}\text{C}$ NMR spectra of <i>m</i> -DPP-PhCN.....                                                                                                                                                                                                                                                                                                                                                                                                                                                                                                                                                     | S4 |
| Figure S5 – $^1\text{H}$ NMR spectra of <i>o</i> -DPP-PhCN.....                                                                                                                                                                                                                                                                                                                                                                                                                                                                                                                                                        | S5 |
| Figure S6 – $^{13}\text{C}$ NMR spectra of <i>o</i> -DPP-PhCN.....                                                                                                                                                                                                                                                                                                                                                                                                                                                                                                                                                     | S5 |
| Figure S7 – Normalized UV absorption spectra of DPP-PhCN acceptors.....                                                                                                                                                                                                                                                                                                                                                                                                                                                                                                                                                | S6 |
| Figure S8 – <i>J-V</i> curves of OPV devices using chloroform as a solvent with various blend ratios and annealing temperatures.....                                                                                                                                                                                                                                                                                                                                                                                                                                                                                   | S8 |
| Figure S9. AFM images ( $10 \times 10 \mu\text{m}$ ) of the (a) Device I (P3HT: <i>p</i> -DPP-PhCN = 1:1, rms = 4.97 nm), (b) Device II (P3HT: <i>o</i> -DPP-PhCN: <i>p</i> -DPP-PhCN = 1:0.25:0.75, rms = 11.49 nm), (c) Device III (P3HT: <i>o</i> -DPP-PhCN: <i>p</i> -DPP-PhCN = 1:0.5:0.5, rms = 8.20 nm), (d) Device IV (P3HT: <i>o</i> -DPP-PhCN: <i>p</i> -DPP-PhCN = 1:0.75:0.25, rms = 2.95 nm), (e) Device V (P3HT: <i>o</i> -DPP-PhCN = 1:1, rms = 4.71 nm), and (f) P3HT: <i>o</i> -DPP-PhCN: <i>p</i> -DPP-PhCN = 1:0.25:0.75 (rms = 6.26 nm). The films were annealed at 120 °C (a–e) or 90 °C (f)..... | S9 |

## 1. $^1\text{H}$ and $^{13}\text{C}$ NMR spectra

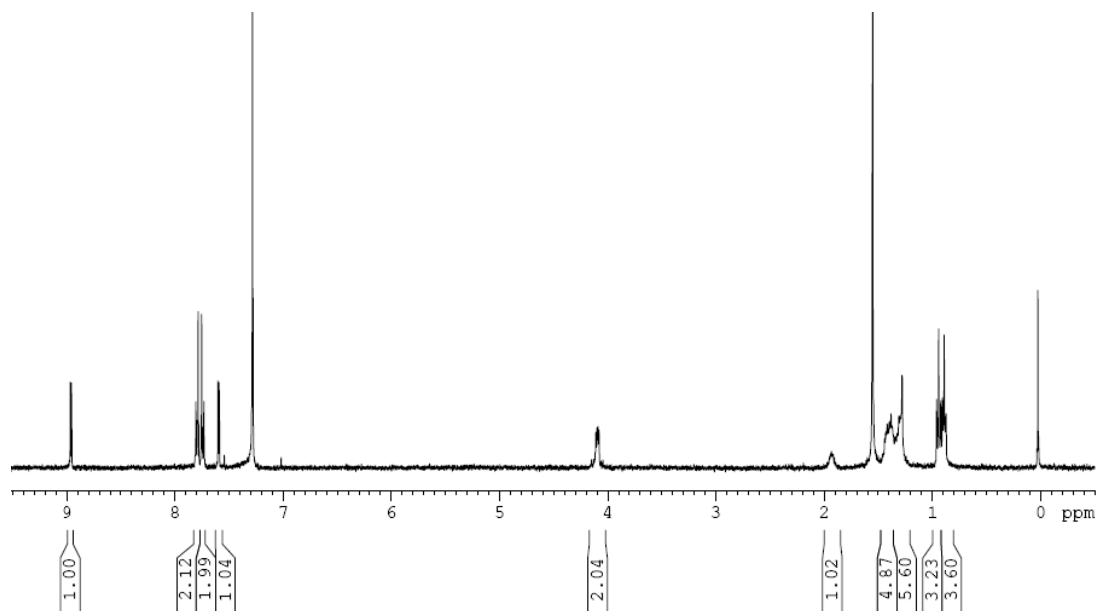

**Figure S1.**  $^1\text{H}$  NMR spectra of *p*-DPP-PhCN.

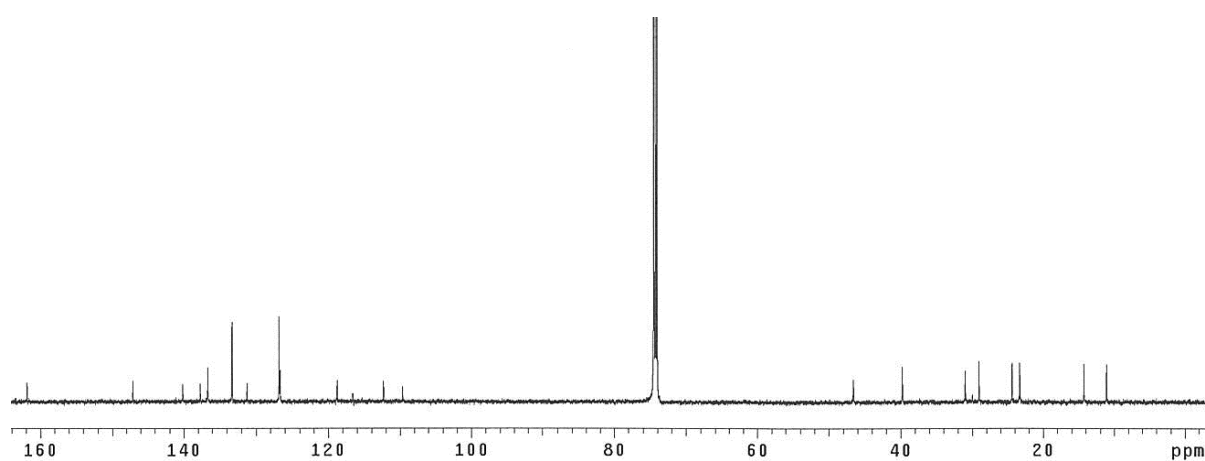

**Figure S2.**  $^{13}\text{C}$  NMR spectra of *p*-DPP-PhCN.

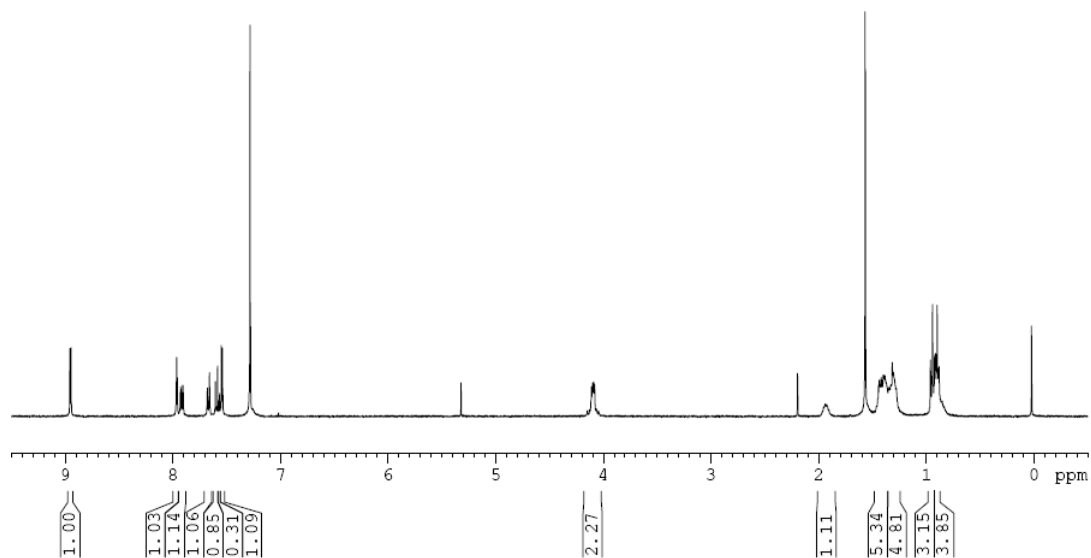

**Figure S3.**  $^1\text{H}$  NMR spectra of *m*-DPP-PhCN.

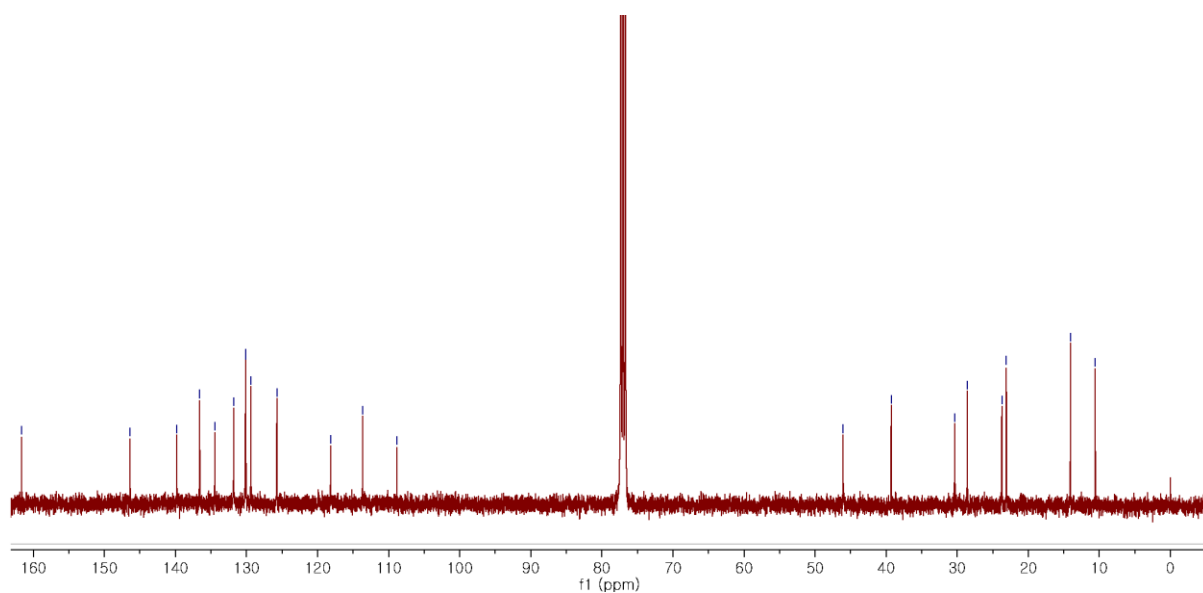

**Figure S4.**  $^{13}\text{C}$  NMR spectra of *m*-DPP-PhCN.

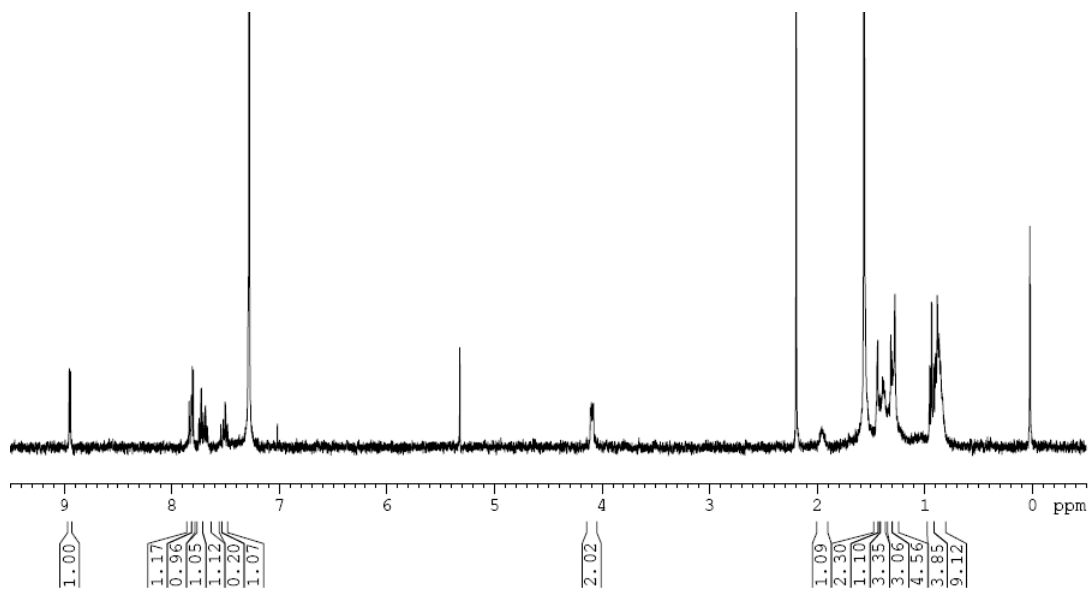

**Figure S5.**  $^1\text{H}$  NMR spectra of *o*-DPP-PhCN.

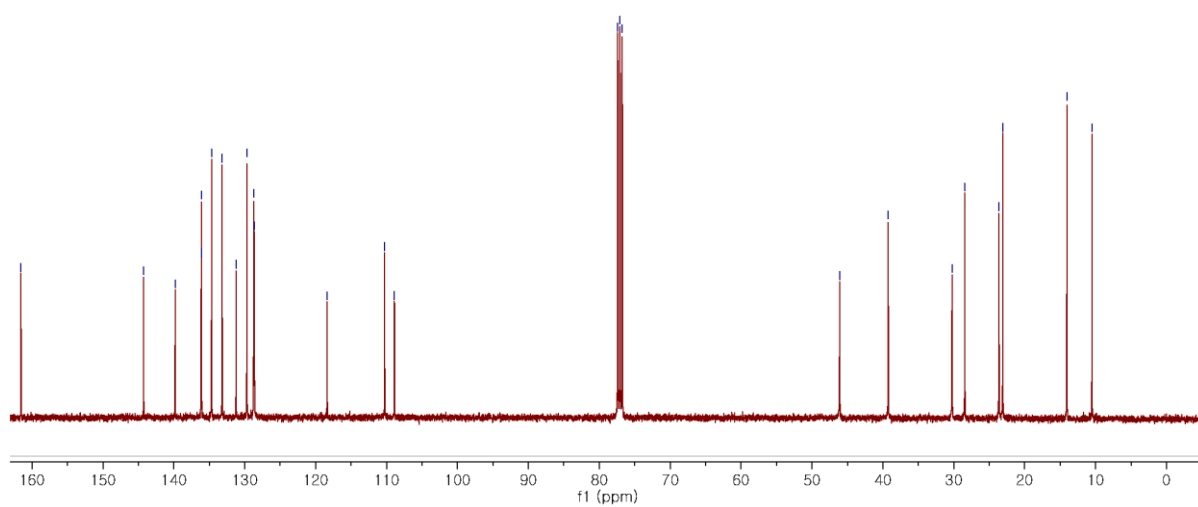

**Figure S6.**  $^{13}\text{C}$  NMR spectra of *o*-DPP-PhCN.

## 2. Normalized UV absorption spectra

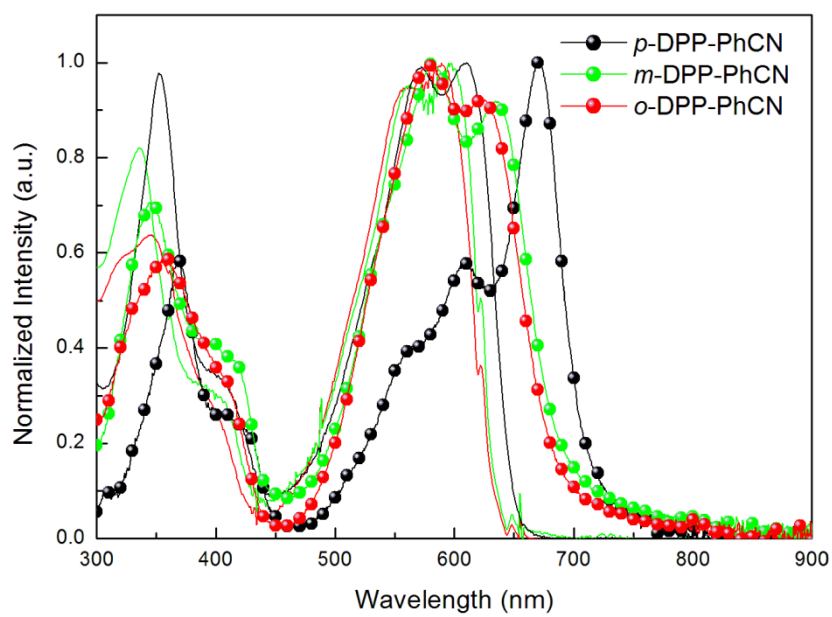

**Figure S7.** Normalized UV absorption spectra of **DPP-PhCN** acceptors in solution (solid lines) and film (symbols).

### 3. OPV characteristics

**Table S1.** Photovoltaic performances with various blend ratios and annealing temperatures <sup>a</sup>

| Active layer             | D/A ratio | Annealing Temp (°C) | V <sub>OC</sub> (V) | J <sub>SC</sub> (mA/cm <sup>2</sup> ) | FF (%) | PCE (%) |
|--------------------------|-----------|---------------------|---------------------|---------------------------------------|--------|---------|
| P3HT: <i>p</i> -DPP-PhCN | 1:2       | 90                  | 0.59                | 1.52                                  | 40     | 0.35    |
|                          |           | 120                 | 0.38                | 1.44                                  | 40     | 0.22    |
|                          |           | 150                 | 0.15                | 0.78                                  | 37     | 0.04    |
|                          | 1:1       | 90                  | 0.78                | 1.24                                  | 37     | 0.36    |
|                          |           | 120                 | 0.56                | 1.64                                  | 50     | 0.47    |
|                          |           | 150                 | 0.28                | 0.73                                  | 43     | 0.09    |
|                          | 2:1       | 90                  | 0.47                | 1.01                                  | 49     | 0.23    |
|                          |           | 120                 | 0.44                | 1.48                                  | 54     | 0.35    |
|                          |           | 150                 | 0.24                | 1.18                                  | 46     | 0.13    |
| P3HT: <i>m</i> -DPP-PhCN | 1:2       | 90                  | 0.51                | 0.43                                  | 29     | 0.06    |
|                          |           | 120                 | 0.55                | 0.58                                  | 32     | 0.10    |
|                          |           | 150                 | 0.32                | 0.30                                  | 29     | 0.03    |
|                          | 1:1       | 90                  | 0.43                | 0.47                                  | 30     | 0.06    |
|                          |           | 120                 | 0.45                | 0.56                                  | 31     | 0.08    |
|                          |           | 150                 | 0.28                | 0.29                                  | 36     | 0.03    |
|                          | 2:1       | 90                  | 0.45                | 0.36                                  | 33     | 0.05    |
|                          |           | 120                 | 0.51                | 0.33                                  | 27     | 0.05    |
|                          |           | 150                 | 0.26                | 0.18                                  | 35     | 0.02    |
| P3HT: <i>o</i> -DPP-PhCN | 1:2       | 90                  | 1.09                | 1.14                                  | 34     | 0.43    |
|                          |           | 120                 | 1.07                | 1.22                                  | 28     | 0.37    |
|                          |           | 150                 | 0.12                | 0.42                                  | 32     | 0.02    |
|                          | 1:1       | 90                  | 1.08                | 0.81                                  | 46     | 0.40    |
|                          |           | 120                 | 1.09                | 1.19                                  | 35     | 0.46    |
|                          |           | 150                 | 0.25                | 0.39                                  | 36     | 0.04    |
|                          | 2:1       | 90                  | 1.09                | 0.92                                  | 44     | 0.44    |
|                          |           | 120                 | 1.09                | 1.17                                  | 36     | 0.46    |
|                          |           | 150                 | 0.58                | 0.82                                  | 45     | 0.22    |

<sup>a</sup> Devices are spin-coated from a chloroform solution and annealed for 10 min

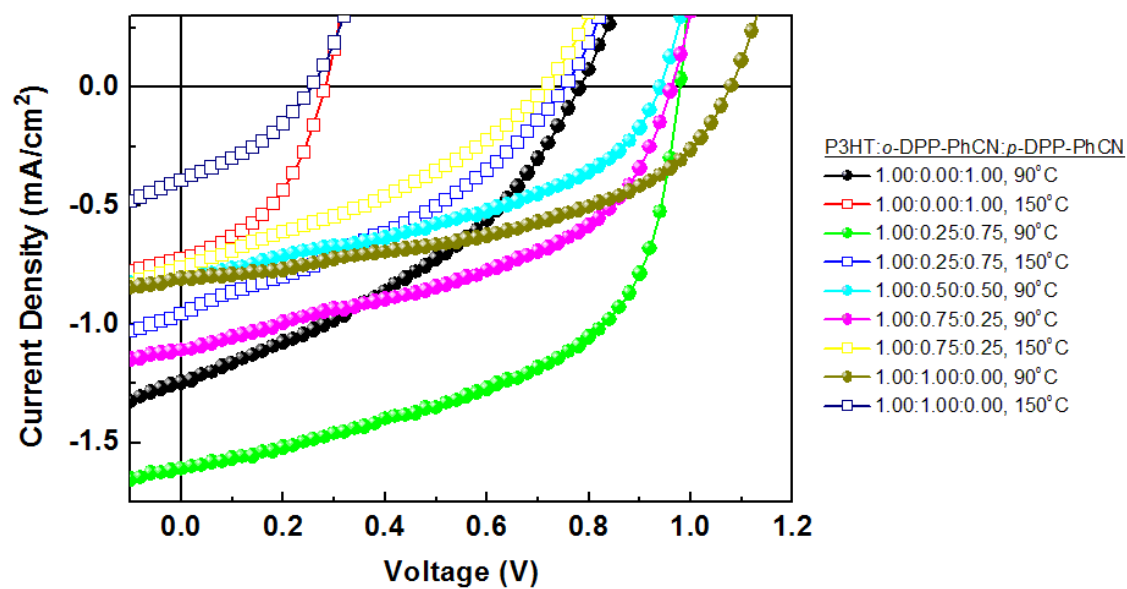

**Figure S8.**  $J$ - $V$  curves of OPV devices using chloroform as a solvent with various blend ratios and annealing temperatures.



#### 4. Atomic force microscopy (AFM) images

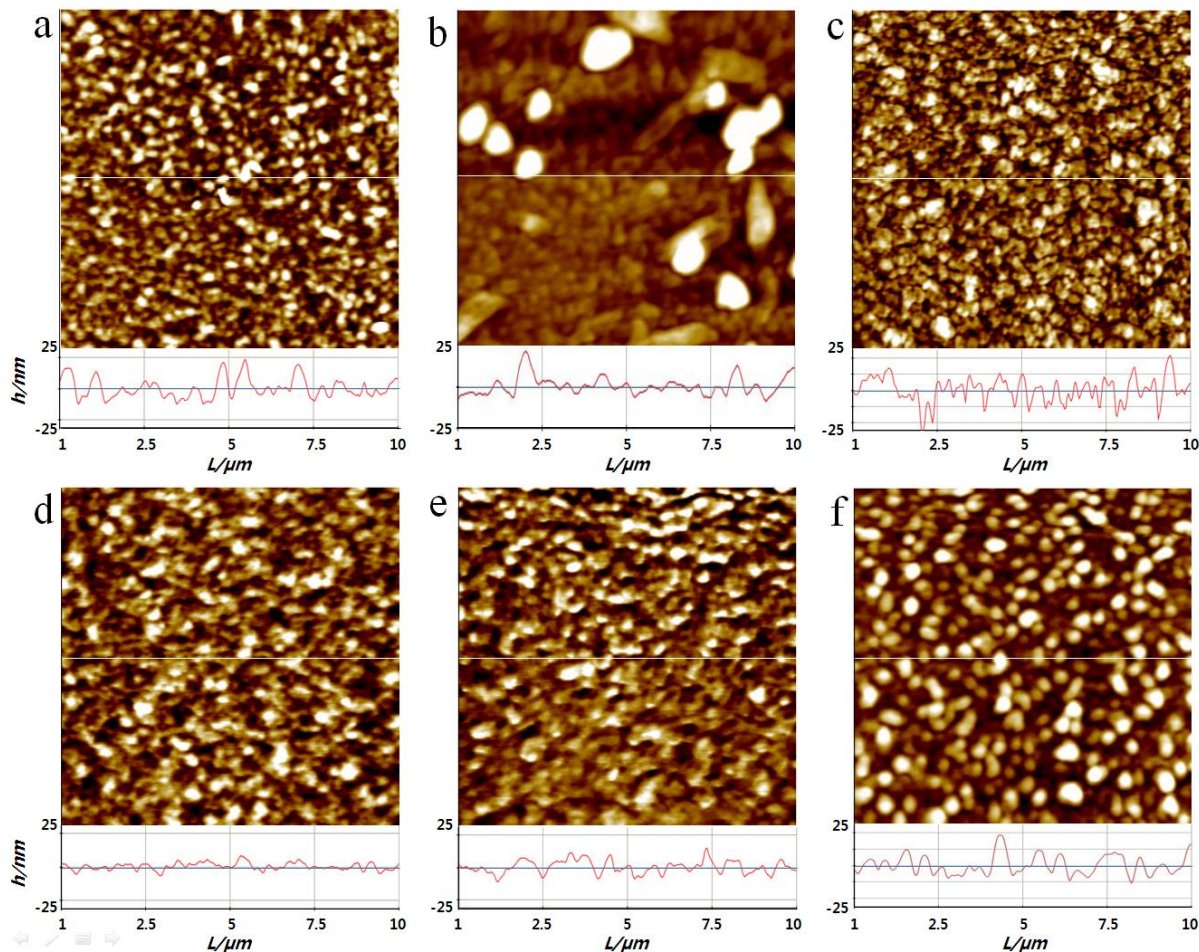

**Figure S9.** AFM images (10 × 10 μm) of the (a) Device I (P3HT:*p*-DPP-PhCN = 1:1, rms = 4.97 nm), (b) Device II (P3HT:*o*-DPP-PhCN:*p*-DPP-PhCN = 1:0.25:0.75, rms = 11.49 nm), (c) Device III (P3HT:*o*-DPP-PhCN:*p*-DPP-PhCN = 1:0.5:0.5, rms = 8.20 nm), (d) Device IV (P3HT:*o*-DPP-PhCN:*p*-DPP-PhCN = 1:0.75:0.25, rms = 2.95 nm), (e) Device V (P3HT:*o*-DPP-PhCN = 1:1, rms = 4.71 nm), and (f) P3HT:*o*-DPP-PhCN:*p*-DPP-PhCN = 1:0.25:0.75 (rms = 6.26 nm). The films were annealed at 120 °C (a–e) or 90 °C (f).
